# Supplementary material for: Detecting and Profiling Endogenous RNA G-Quadruplexes in the Human Transcriptome
Source: Int J Mol Sci. 2021 Jul 27;22(15):8012. doi: 10.3390/ijms22158012 (PMC8347560; doi:10.3390/ijms22158012)
Supplement: Supplementary file 1 [file ijms-22-08012-s001.zip › Supplementary Tables.xlsx]

## Sheet: Supplementary Table 1
ID	Term	GeneRatio	pvalue	p.adjust (FDR)
hsa04625	C-type lectin receptor signaling pathway	9/138	6.49145e-05	0.00694676
hsa04218	Cellular senescence	11/138	6.66573e-05	0.00694676
hsa05166	Human T-cell leukemia virus 1 infection	13/138	8.61169e-05	0.00694676
hsa05235	PD-L1 expression and PD-1 checkpoint pathway in cancer	8/138	0.000128007	0.00774445
hsa04659	Th17 cell differentiation	8/138	0.000457047	0.022121
hsa04658	Th1 and Th2 cell differentiation	7/138	0.000938537	0.0378543
hsa04750	Inflammatory mediator regulation of TRP channels	7/138	0.00136209	0.041203
hsa04380	Osteoclast differentiation	8/138	0.00148711	0.041203
hsa04933	AGE-RAGE signaling pathway in diabetic complications	7/138	0.00153234	0.041203
hsa04068	FoxO signaling pathway	8/138	0.00172424	0.0417266
hsa04660	T cell receptor signaling pathway	7/138	0.00192237	0.0422922
Supplementary Table 1. KEGG over-representation test results.

## Sheet: Supplementary Table 2
Term	p.adjust (BH)	Overlap	Genes
COVID-19 patients BALF down	1.3246e-08	46/325	ARF3;DAZAP1;TOMM40;SLC44A2;SHC1;EMC10;ZDHHC7;USP19;APH1A;RIC8A;PTPA;SPN;DNAJB2;NDST1;GANAB;GPAT4;PPP6R1;ZC3H7B;KHSRP;SLCO2B1;PPP6R2;RPS6KA1;NACC1;AKT1;SYMPK;FLNA;ANKRD52;ZBTB7B;ACSS1;CMTR1;CHID1;KHNYN;ATP6AP1;SLC11A1;VASH1;KCNAB2;RHOB;HGS;TAOK2;ORAI2;RARA;BAX;GPR107;SIK2;PLEKHO2;NFE2L1
Up-regulated by SARS-CoV-2 in A549-ACE2 treated with Trifluoperazine from GSE154613	1.90157e-07	57/500	DAZAP1;MIDN;KRI1;PTMS;PPP6R1;SIX5;AKT1;CEP250;KIF1C;SBF1;SRRM2;STARD3;ZNF362;RNF44;G6PD;ARHGEF18;SIRT6;ACTN4;MFSD12;ARFGAP1;KLF16;NCOR2;LENG1;ERF;FSCN1;RBCK1;NAT8L;PFDN6;NFIX;RAB5C;WBP2;LRP5;RRBP1;RHOBTB2;SOCS3;NACC1;CLPTM1;CSK;ZNF865;ZBTB7B;MAP2K7;ZBTB7A;FBRS;ISOC2;BTBD19;CBX6;UBE2I;TAF15;DMPK;FBXL19;LIMK1;PDAP1;DOHH;GATAD2A;HOOK2;NFIC;TAOK2
Down-regulated by MHV-A59 in murine spleen 5d from GSE146074	5.41117e-06	53/500	SLC44A2;ATP2A3;NUCKS1;CHD4;LIMD1;CHD2;IKZF3;SPN;RBM3;STK10;CCND2;CSRP1;PPP6R1;ANXA6;SLC39A7;SBF1;YWHAG;SRRM2;BRD2;MAP4K2;RPS9;TAP2;ARHGEF18;PAX5;BAZ1B;DOK3;KAT6A;UTRN;KPNB1;DDX6;AKNA;AHNAK;SDC3;RRBP1;PTPA;PABPN1;EIF4H;NCKAP1L;CSK;HNRNPA0;PTPN1;PLEKHA2;PRRC2C;LNPEP;ARPC4;PRRC2A;COL1A1;HNRNPK;PTPRC;KLHL6;GNB1;GRAP;ITM2C
Up-regulated by MERS-CoV in Calu-3 from GSE122876	7.87268e-06	52/500	SETD5;GSK3B;MIDN;CHD4;CHD2;DUSP16;EPC1;SRRM2;MED1;BRD2;KDM2A;FBXW11;DYRK1A;ASH1L;RHOB;SLC7A5;POLR1A;HGS;PSPC1;GRWD1;PEX5;ATF3;STK40;BIRC3;SEMA7A;SRCAP;CYTH3;DNAJB1;ELMSAN1;TRA2B;DHX37;ZBTB7B;MAP2K7;CCDC71;E2F6;FBRS;ZNF462;PTPN1;CREBBP;JUN;TIPARP;AP3D1;QKI;FOSL2;MED13L;ABTB2;SETX;RNF146;UBAP1;ZNF217;CCDC174;C19ORF48
Up-regulated by SARS-CoV-2 in intestinal organoids 24hr differentiation from GSE149312	7.87268e-06	52/500	CD82;CTSZ;CTSV;PRPF19;PSMD8;BABAM1;FADS2;CSRP1;CAPZB;AKT2;PSMD3;ENSA;FPGS;RCC1;SBF1;RPS9;KDM2A;FBXW8;HMGCS1;SDHC;IL17RE;ATAD3B;MFSD12;LSS;TUBA4A;AES;PRKAR1B;ADGRF4;RAB35;KPNB1;SEMA7A;TOMM40;RETSAT;ATF6B;TACSTD2;OAZ2;DPP3;DNAJB2;APH1A;TRA2B;FLNA;CSK;S100A14;MORC2;ISOC2;TRAPPC3;LIMK1;PDAP1;AP2B1;PRRC2A;TSPAN17;BAX
Up-regulated by SARS-CoV-2 infection in Vero E6 from GSE153940	2.23409e-05	47/450	PHF2;SEMA7A;PANK2;TRIO;ELL;SRF;IRS2;RHOBTB2;PURB;SOCS3;TMEM201;LARP1;UNK;ATXN1;PLCG1;IP6K1;MAP2K7;IER5;ZBTB7A;SNX8;MORC2;ZNF385A;RBM33;PIAS4;BRD2;CREBBP;JUN;KDM2A;TPRA1;ATP8B2;DAPK3;SEMA4C;ARID3A;GTF2H4;GATAD2B;ARFGAP1;ABTB2;EHD4;SH3BP5L;TRAF4;ADAM15;KAT6A;DNAJA3;CDK13;NAT8L;ATF3;STK40
Down-regulated by SARS-CoV-2 in ferret trachea from GSE147507	4.01904e-05	45/434	ITIH5;SEMA7A;SDC3;SEMA3G;ADARB1;SYNE3;TSPAN11;PPM1F;NKD1;ADAMTS4;MPRIP;CHST11;CSRP1;SLC17A9;TSPAN9;MPZ;PRX;ANXA6;FLNA;PGM5;CSK;ZNF865;TNS1;SEMA6B;ZCCHC24;PDGFRB;TMEM120B;SLC12A4;DMPK;RASL10B;MFSD12;RGMA;COL1A1;NCOR2;MMP14;KIAA1614;NR4A3;ADAM15;NFIC;COL5A3;RARA;ITGA7;HOXD4;MAPT;MFGE8
SARS Perturbation Up Genes Mouse Lung from GSE19137:GPL1261:5	9.93166e-05	33/291	EPAS1;SLC44A2;EMC10;NUCKS1;PRPF19;LASP1;MAP1LC3A;AMMECR1L;PABPN1;BASP1;DPYSL2;PRX;HCFC1R1;PSAP;EIF4H;TRIM25;RPL13;CDIPT;WASF2;BRD2;KLHDC3;RPS9;SMAD4;ARHGEF12;TUBB;MAPK11;EHD4;HNRNPK;FSCN1;CHMP4B;RBMS1;NSMF;MFGE8
Healthy lung biopsy vs. COVID-19 infected lung series 15 from GSE147507 down genes	9.93166e-05	48/500	SRCAP;AHNAK;CD82;DLST;ZDHHC7;PRDM2;ZBTB44;UBE2J2;TTL;USP19;TRAK2;RND1;DNAJB2;APH1A;NDST1;ACTR1B;ZC3H7B;PPP6R2;HCFC1R1;TSPAN4;EPC1;SLC39A7;TNS1;PDGFRB;STARD3;KLHDC3;JUN;SPRYD3;ATP8B2;TMEM255B;DAPK3;PMM2;VPS13D;SEMA4C;TTC7A;TUBA4A;HIPK2;MMP14;ADAM15;PQLC1;PSMC1;SGSM2;CRY2;PEX5;PLEKHO2;ARHGEF7;BAP1;C19ORF48
Up-regulated by MERS infection of Calu3 cells	9.93166e-05	48/500	SETD5;GSK3B;KDM5C;MAX;CHD4;CHD2;DUSP16;MRM1;IKZF3;RND1;CYTH3;DNAJB1;LARP1;ELMSAN1;TRA2B;DHX37;EPC1;IP6K1;E2F6;TNPO3;RBM33;MED1;BRD2;ZNF462;PTPN1;JUN;KDM2A;TIPARP;PMM2;CDC6;ASH1L;PHC3;GTPBP4;QKI;FOSL2;RNF41;MED13L;ABTB2;RNF146;SLC7A5;RNF145;NEURL4;UBAP1;ZNF217;ETF1;ATF3;KPNB1;BIRC3
Down-regulated by SARS-CoV-2 in lung tissue from GSE147507	9.93166e-05	48/500	SRCAP;AHNAK;CD82;DLST;ZDHHC7;PRDM2;ZBTB44;UBE2J2;TTL;USP19;TRAK2;RND1;DNAJB2;APH1A;NDST1;ACTR1B;ZC3H7B;PPP6R2;HCFC1R1;TSPAN4;EPC1;SLC39A7;TNS1;PDGFRB;STARD3;KLHDC3;JUN;SPRYD3;ATP8B2;TMEM255B;DAPK3;PMM2;VPS13D;SEMA4C;TTC7A;TUBA4A;HIPK2;MMP14;ADAM15;PQLC1;PSMC1;SGSM2;CRY2;PEX5;PLEKHO2;ARHGEF7;BAP1;C19ORF48
Up-regulated by SARS-CoV-1 in Calu-3 4hr from GSE148729	0.000187477	47/499	SEMA7A;MIDN;TRIO;CDKN1B;ONECUT2;ZBTB20;XIAP;ATP6AP1L;PURB;SOCS3;TMEM65;ZMAT3;SNAPC3;DHX37;UBXN7;ZNF865;HIF1AN;GPC4;ZBTB7A;MORC2;SOX4;IFNAR2;TMEM184A;ZNF462;JUN;ARHGEF12;KHNYN;FBXL19;INSR;VPS13D;ARHGEF18;EMSY;QKI;RHOB;ABTB2;SETX;KLF8;FERMT1;PLCB3;GFOD1;MDM2;SLC25A30;MAP3K10;LCOR;PHF13;SOS1;ZNF697
Down-regulated by MHV-A59 in murine spleen 3d from GSE146074	0.000386331	46/500	DDX6;KDM5C;AKNA;AHNAK;CELF1;SLC44A2;ATP2A3;CHD4;LIMD1;CHD2;SPN;PTPA;RBM3;STK10;CAPZB;PABPN1;PPP6R1;ANXA6;UBTF;EIF4H;FLNA;RPL13;ACP5;CSK;SBF1;WASF2;HNRNPA0;SRRM2;BRD2;GRIPAP1;MAP4K2;RPS9;CSNK2A1;PLEKHA2;ARHGEF18;ARPC4;ASH1L;PRRC2A;VAV2;SETX;HNRNPK;DOK3;RBCK1;GRAP;UTRN;ITM2C
Down-regulated by SARS-CoV-2 in intestinal organoids 24hr expansion from GSE149312	0.000742535	45/500	SETD5;APP;DAZAP1;NFIX;CCNT1;PDXP;TMEM97;ZBTB44;RLF;TRIOBP;PTMS;ATXN1;STC2;SNAPC3;PSAP;ANXA6;BBX;CEP250;PIP4K2B;ZNF766;ATXN7L3;SOX4;ZNF385A;CADM4;POU2F1;USP49;CSNK2A1;KHNYN;TMEM255B;ATP6AP1;CKAP2L;TMEM120A;INSR;PRRC2C;ASH1L;IL17RE;GATAD2B;NIPSNAP1;TMUB2;SMOC1;KAT6A;SGSM2;PHF13;CDK16;FGFR1
Up-regulated by SARS-CoV-2 in Calu-3 4hr from GSE148729	0.00258967	43/499	SETD5;SEMA7A;MIDN;PPM1L;CELF1;ITPRIPL2;SOCS3;LARP1;TATDN2;MPRIP;HAS3;DHX37;SYMPK;ZBTB7A;SOCS7;MORC2;TMEM184A;RAP1GAP2;ZNF462;JUN;ARHGEF12;KHNYN;KCNJ11;ATP6AP1;INSR;FBXL18;ARHGEF18;ASH1L;DOHH;GTF2H4;HIPK2;FERMT1;SLC7A5;TSPAN14;HOOK2;GFOD1;NFIC;SLC25A30;ZNF217;MAP3K10;ATF3;TRIM56;FGFR1
Up-regulated by SARS-CoV-2 2 MOI in A549 transduced with ACE2 vector from GSE147507	0.00258967	43/500	SETD5;CDKN1B;ANKRD33B;ELL;CCNT1;CELF1;IFIT1;CHD2;RLF;DUSP16;RND1;GOLGA7B;PURB;SOCS3;COL4A3BP;ELMSAN1;SPOCK2;PRX;EPC1;TRIM25;UBXN7;IER5;ZNF641;NKX3-1;RBM33;MED1;ZNF462;JUN;POU2F1;TIPARP;POU2F2;ETV3;PHC3;ABTB2;SETX;HIC2;ZEB2;KAT6A;CCDC174;ATF3;STK40;BIRC3;OTUD3
Up-regulated by MERS-CoV in Calu-3 24hr from GSE139516	0.00880165	41/500	SETD5;TRIO;ZBTB20;ABCA12;CHD2;DUSP16;PHF21A;ELMSAN1;TRA2B;EPC1;FEM1C;SYNPO;E2F6;SOX4;KCMF1;MED1;BRD2;ZNF462;CREBBP;JUN;SZT2;KDM2A;DMPK;TIPARP;DYRK1A;ASH1L;PHC3;QKI;ZZEF1;FOSL2;MED13L;SETX;RNF146;RNF145;UBAP1;ZNF217;LCOR;CCDC174;ZNF697;ATF3;BIRC3
Down-regulated genes in A549 infected with COVID-19 extracted from GSE147507	0.014408	40/500	NDRG4;RETSAT;AHNAK;WBP2;MSI2;TRIOBP;RHOBTB2;FAM110A;SMPD3;DNAJB2;PREX1;NEURL1B;PODNL1;ATXN1;ESPNL;ACTR1B;AMDHD2;FDXR;SNX8;RNF44;TPRA1;DMPK;METRN;ARHGEF18;VASH1;KCNAB2;FBXO10;BTBD9;MFSD12;LSS;COL1A1;NCOR2;ACAP3;FBXL8;DOK3;PRKAR1B;ORAI2;NSMF;MDGA1;TELO2
Down-regulated by SARS-CoV-2 0.2 MOI in A549 from GSE147507	0.014408	40/500	NDRG4;RETSAT;AHNAK;WBP2;MSI2;TRIOBP;RHOBTB2;FAM110A;SMPD3;DNAJB2;PREX1;NEURL1B;PODNL1;ATXN1;ESPNL;ACTR1B;AMDHD2;FDXR;SNX8;RNF44;TPRA1;DMPK;METRN;ARHGEF18;VASH1;KCNAB2;FBXO10;BTBD9;MFSD12;LSS;COL1A1;NCOR2;ACAP3;FBXL8;DOK3;PRKAR1B;ORAI2;NSMF;MDGA1;TELO2
Genome-wide CRISPR screen reveals host genes that regulate SARS-CoV-2 infection	0.0152251	6/27	SMAD4;SMAD3;DYRK1A;UBXN7;ACVR1B;JMJD6
Down-regulated by SARS-CoV-2 0.2 MOI in A549 transduced with ACE2 vector from GSE147507	0.0232425	39/500	APP;AHNAK;CCDC127;CD82;OLFML2A;DPP3;CYTH3;NDST1;FADS2;GANAB;LASP1;CSRP1;CAPZB;SLCO2B1;PEA15;PSAP;ANXA6;FLNA;CD59;ANKRD52;PRKACA;ACSS1;KLHDC3;RPS9;G6PD;HMGCS1;ATP6AP1;TRAFD1;PRKCA;ACTN4;AP2B1;LSS;SND1;TUBA4A;CPPED1;PRKAR1B;FSCN1;MFGE8;ERGIC1
SARS coronavirus orf1ab from Virus-Host PPI P-HIPSTer 2020	0.0256761	19/194	APP;CSNK2A1;HSPA4;STAT3;XIAP;RAD23B;SPTB;TMUB2;ING5;NUB1;SNX1;HGS;DDI2;UBQLN1;RCC1;RPL13;RBCK1;YWHAG;BIRC3
Up-regulated by SARS-CoV-2 in NHBE from GSE147507	0.0368598	38/500	SEMA7A;STOML1;CD82;ITGB3;MPV17L2;KIAA0100;SHB;C1ORF74;IFIT1;RND1;NEURL1B;STK10;SOCS3;GNA15;CSRP1;ANXA6;HAS3;TRIM25;LGALS9;N4BP3;DUSP4;ELOVL1;IZUMO4;SMAD3;HMGCS1;TUBB;TAP2;IRAK3;AMPD3;POU2F2;LSS;TUBA4A;MTSS1;FERMT1;SAA2;IVL;PFDN6;BIRC3
SARS coronavirus protein E from Virus-Host PPI P-HIPSTer 2020	0.0375958	4/15	APP;HSPA4;STAT3;RAD23B
SARS coronavirus P2 envelope protein from Virus-Host PPI P-HIPSTer 2020	0.0375958	4/15	APP;HSPA4;STAT3;RAD23B
Supplementary Table 2. Enrichment analysis (COVID-19 related gene sets) results for the genes that possess OG4s in its 3'-UTR.
